# Supplementary material
Source: HighWire-hosted journal article supplement (https://cmaj.ca/highwire/filestream/57658/field_highwire_adjunct_files/0/deri-van-1-at.pdf)
Supplement: deri-van-1-at.pdf [file deri-van-1-at.pdf]

**Appendix A (as supplied by the authors):** Most common hospital diagnoses and procedures in study cohort

|                                                 | Overall<br>(n=4,812) | Dead or unplanned<br>Readmission in 30 days |                      |
|-------------------------------------------------|----------------------|---------------------------------------------|----------------------|
|                                                 |                      | No (N=4,427,<br>92.0%)                      | Yes (N=385,<br>8.0%) |
| <b>Hospital Diagnoses:</b>                      |                      |                                             |                      |
| Acute coronary syndrome                         | 306 (6.4%)           | 283 (6.4%)                                  | 23 (6.0%)            |
| Cancer                                          | 257 (5.3%)           | 242 (5.5%)                                  | 15 (3.9%)            |
| Heart failure                                   | 218 (4.5%)           | 181 (4.1%)                                  | 37 (9.6%)            |
| Pneumonia                                       | 160 (3.3%)           | 139 (3.1%)                                  | 21 (5.5%)            |
| Atrial fibrillation and other dysrhythmias      | 130 (2.7%)           | 116 (2.6%)                                  | 14 (3.6%)            |
| Arthritis                                       | 136 (2.8%)           | 133 (3.0%)                                  | 3 (0.8%)             |
| Renal failure                                   | 109 (2.3%)           | 88 (2.0%)                                   | 21 (5.5%)            |
| Bowel Obstruction                               | 106 (2.2%)           | 95 (2.1%)                                   | 11 (2.9%)            |
| Urinary tract infection                         | 102 (2.1%)           | 88 (2.0%)                                   | 14 (3.6%)            |
| Dehydration and Electrolyte disorders           | 86 (1.8%)            | 69 (1.6%)                                   | 17 (4.4%)            |
| Cellulitis + Soft tissue infections             | 94 (2.0%)            | 86 (1.9%)                                   | 8 (2.1%)             |
| Diverticulitis                                  | 86 (1.8%)            | 80 (1.8%)                                   | 6 (1.6%)             |
| Syncope, fever, and other symptomatic diagnoses | 83 (1.7%)            | 78 (1.8%)                                   | 5 (1.3%)             |
| Diabetes mellitus                               | 78 (1.6%)            | 72 (1.6%)                                   | 6 (1.6%)             |
| Chest pain NYD                                  | 75 (1.6%)            | 70 (1.6%)                                   | 5 (1.3%)             |
| Peptic ulcer disease                            | 63 (1.3%)            | 57 (1.3%)                                   | 6 (1.6%)             |
| Abdominal pain NYD                              | 66 (1.4%)            | 57 (1.3%)                                   | 9 (2.3%)             |
| Cholecystitis and biliary disorders             | 64 (1.3%)            | 60 (1.4%)                                   | 4 (1.0%)             |
| Pancreatitis                                    | 65 (1.4%)            | 59 (1.3%)                                   | 6 (1.6%)             |
| Acute appendicitis                              | 50 (1.0%)            | 48 (1.1%)                                   | 2 (0.5%)             |
| <b>Hospital Procedures</b>                      |                      |                                             |                      |
| Angioplasty and CABG                            | 221 (4.6%)           | 206 (4.7%)                                  | 15 (3.9%)            |
| Knee arthroplasty                               | 192 (4.0%)           | 188 (4.2%)                                  | 4 (1.0%)             |
| Hip arthroplasty                                | 125 (2.6%)           | 122 (2.8%)                                  | 3 (0.8%)             |
| Appendectomy                                    | 118 (2.5%)           | 115 (2.6%)                                  | 3 (0.8%)             |
| Colectomy / Colostomy / Ileostomy               | 81 (1.7%)            | 76 (1.7%)                                   | 5 (1.3%)             |
| Laparoscopic Cholecystectomy                    | 75 (1.6%)            | 69 (1.6%)                                   | 6 (1.6%)             |
| Open Prostatectomy                              | 70 (1.5%)            | 70 (1.6%)                                   | 0 (0.0%)             |
| Hysterectomy                                    | 47 (1.0%)            | 44 (1.0%)                                   | 3 (0.8%)             |
| Heart Catheterization                           | 35 (0.7%)            | 33 (0.7%)                                   | 2 (0.5%)             |
| Incisional Hernia repair                        | 28 (0.6%)            | 24 (0.5%)                                   | 4 (1.0%)             |
| Shoulder surgery                                | 24 (0.5%)            | 23 (0.5%)                                   | 1 (0.3%)             |

**Appendix to:** van Walraven, C, Dhalla IA, Bell C, et al. Derivation and validation of an index to predict early death or unplanned readmission after discharge from hospital to the community. *CMAJ* 2010. DOI:10.1503/cmaj.091117.
